# Supplementary material for: Reduction of Mn3+ to Mn2+ and near infrared plasmonics from Mn–Sn codoped In2O3 nanocrystals
Source: Royal Society of Chemistry journal article supplement (doi:10.1039/c6ra16676h), 2016-01-01
Supplement: c6ra16676h1.pdf [file c6ra16676h1.pdf]

**Reduction of Mn<sup>3+</sup> to Mn<sup>2+</sup> and Near Infrared Plasmonics from  
Mn-Sn codoped In<sub>2</sub>O<sub>3</sub> Nanocrystals**

Anur Yadav<sup>a</sup>, Bharat Tandon<sup>\*a</sup>, Angshuman Nag<sup>\*a,b</sup>

<sup>a</sup> *Department of Chemistry, and* <sup>b</sup> *Centre for Energy Science, Indian Institute of Science  
Education and Research, Pune 411008, India*

\*Corresponding author e-mail A.N.: [angshuman@iiserpune.ac.in](mailto:angshuman@iiserpune.ac.in)

B.T.: [bharat.tandon@students.iiserpune.ac.in](mailto:bharat.tandon@students.iiserpune.ac.in)

**Electronic Supplementary Information (ESI)**

| <b>In : Mn : Sn (atomic ratio)</b> |                        |                            |
|------------------------------------|------------------------|----------------------------|
| <b>Precursor Ratio</b>             | <b>EDX Composition</b> | <b>ICP-AES Composition</b> |
| 99 : 1 : 0                         | 98.9 : 1.1 : 0         | 99.2 : 0.8 : 0             |
| 95 : 5 : 0                         | 95.5 : 4.5 : 0         | 95.5 : 4.5 : 0             |
| 90 : 5 : 5                         | 89.4 : 5.6 : 5.0       | 91.6 : 4.7 : 3.7           |
| 85 : 5 : 10                        | 84.1 : 5.5 : 10.4      | 88.5 : 4.5 : 7.0           |

**Table ST1:** Comparison of elemental compositions (atomic ratios) obtained by ICP-OES and EDX techniques showing similar results from both techniques and are good correlation with precursor ratios.

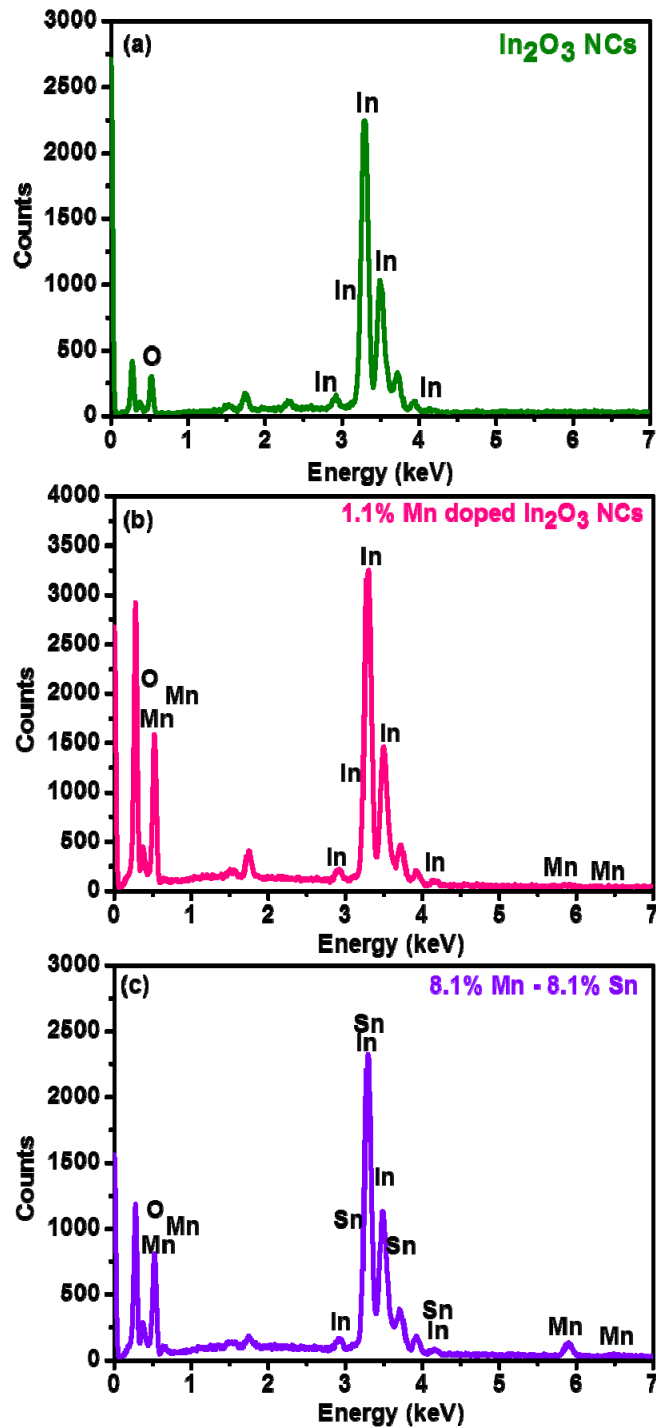

**Figure S1:** Comparison of EDX patterns of (a) undoped  $\text{In}_2\text{O}_3$  NCs with (b) 1.1% Mn doped and (c) 8.1% Mn-8.1% Sn codoped  $\text{In}_2\text{O}_3$  NCs to represent increase in Mn peak(s) intensity with increase in Mn doping percentage.

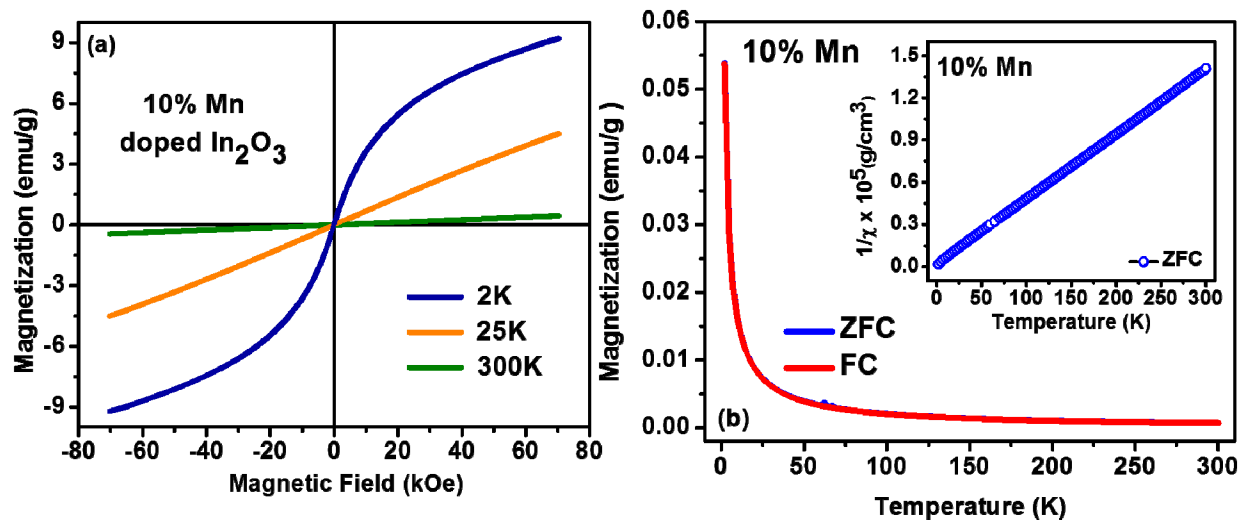

**Figure S2:** (a) Magnetization vs magnetic field strength curves for 10% Mn doped  $\text{In}_2\text{O}_3$  NCs with zero coercivity and no hysteresis indicating absence of ferromagnetism in grains. (b) Temperature dependent magnetization (zero field cooling, field cooling at 100 Oe) curves overlapping completely with each other confirming presence of paramagnetism in 10% Mn doped  $\text{In}_2\text{O}_3$  NCs. Inset shows linear behavior of  $1/\text{susceptibility}$  vs temperature plot depicting that Curie-Weiss law.
